# Supplementary material
Source: MDPI journal article supplement (https://www.mdpi.com/2076-3417/12/7/3673)

## SUPPLEMENTARY MATERIAL

Table S1. Sample of results from the analysis of statistical significance.

|                     | Holdout -<br>Manual<br>Augmentation | Holdout -<br>Augmentation<br>with SMOTE | Holdout -<br>Augmentation with<br>Borderline-SMOTE | Holdout -<br>Augmentation with<br>Borderline-SMOTE<br>SVM | CV-<br>SMOTE |
|---------------------|-------------------------------------|-----------------------------------------|----------------------------------------------------|-----------------------------------------------------------|--------------|
| Value-P - AH        | 0.904                               | 0.027                                   | 0.001                                              | 0.005                                                     | 0.007        |
| Value-P - DM        | 0.000                               | 0.000                                   | 0.000                                              | 0.000                                                     | 0.000        |
| Value-P - CREA      | 0.768                               | 0.000                                   | 0.001                                              | 0.002                                                     | 0.000        |
| Value-P - UREA      | 0.354                               | 0.896                                   | 0.774                                              | 0.959                                                     | 0.186        |
| Value-P - ALBU      | 0.000                               | 0.000                                   | 0.000                                              | 0.000                                                     | 0.000        |
| Value-P - AGE       | 0.007                               | 0.000                                   | 0.000                                              | 0.000                                                     | 0.000        |
| Value-P -<br>GENDER | 0.356                               | 0.120                                   | 0.996                                              | 0.559                                                     | 0.569        |
| Value-P - GFR       | 0.774                               | 0.887                                   | 0.198                                              | 0.267                                                     | 0.159        |
| F-statistic         | 29.50                               | 147.300                                 | 134.500                                            | 97.800                                                    | 126.900      |
| R-squared           | 0.692                               | 0.858                                   | 0.847                                              | 0.8200                                                    | 0.828        |

Table S2. Results for the hold-out method without using the framework proposed by Pineda-Bautista et al.

|                            | ACC   | PR   | Recall | Weighted<br>F1 | Macro<br>F1 | MCC  | FMI  |
|----------------------------|-------|------|--------|----------------|-------------|------|------|
| <b>Manual Augmentation</b> |       |      |        |                |             |      |      |
| Decision Tree              | 83.33 | 0.77 | 0.83   | 0.79           | 0.61        | 0.74 | 0.77 |
| Random Forest              | 88.88 | 0.80 | 0.88   | 0.84           | 0.71        | 0.83 | 0.88 |
| Adaboost DT                | 83.33 | 0.83 | 0.83   | 0.83           | 0.80        | 0.73 | 0.72 |

|          |       |      |      |      |      |      |      |
|----------|-------|------|------|------|------|------|------|
| OLA      | 72.22 | 0.76 | 0.72 | 0.70 | 0.51 | 0.62 | 0.64 |
| LCA      | 83.33 | 0.84 | 0.83 | 0.82 | 0.58 | 0.77 | 0.87 |
| KNORA-U  | 83.33 | 0.84 | 0.83 | 0.82 | 0.58 | 0.77 | 0.87 |
| KNORA-E  | 83.33 | 0.91 | 0.83 | 0.84 | 0.73 | 0.76 | 0.75 |
| META-DES | 88.88 | 0.88 | 0.88 | 0.88 | 0.62 | 0.82 | 0.98 |

#### Manual Augmentation + Augmentation with SMOTE

|               |       |      |      |      |      |      |      |
|---------------|-------|------|------|------|------|------|------|
| Decision Tree | 83.33 | 0.86 | 0.83 | 0.84 | 0.80 | 0.74 | 0.78 |
| Random Forest | 77.77 | 0.81 | 0.77 | 0.78 | 0.70 | 0.66 | 0.65 |
| Adaboost DT   | 83.33 | 0.86 | 0.83 | 0.84 | 0.80 | 0.74 | 0.78 |
| OLA           | 88.88 | 0.94 | 0.88 | 0.89 | 0.88 | 0.85 | 0.82 |
| LCA           | 83.33 | 0.86 | 0.83 | 0.84 | 0.80 | 0.74 | 0.78 |
| KNORA-U       | 88.88 | 0.94 | 0.88 | 0.89 | 0.88 | 0.85 | 0.82 |
| KNORA-E       | 83.33 | 0.90 | 0.83 | 0.85 | 0.71 | 0.76 | 0.80 |
| META-DES      | 83.33 | 0.78 | 0.83 | 0.80 | 0.70 | 0.73 | 0.79 |

#### Manual Augmentation + Augmentation with Borderline-SMOTE

|               |       |      |      |      |      |      |      |
|---------------|-------|------|------|------|------|------|------|
| Decision Tree | 88.88 | 0.88 | 0.88 | 0.88 | 0.84 | 0.82 | 0.84 |
| Random Forest | 77.77 | 0.84 | 0.77 | 0.79 | 0.67 | 0.68 | 0.71 |
| Adaboost DT   | 61.11 | 0.75 | 0.61 | 0.64 | 0.58 | 0.46 | 0.44 |
| OLA           | 94.44 | 0.96 | 0.94 | 0.94 | 0.93 | 0.91 | 0.90 |
| LCA           | 88.88 | 0.88 | 0.88 | 0.88 | 0.84 | 0.82 | 0.84 |
| KNORA-U       | 88.88 | 0.93 | 0.88 | 0.89 | 0.83 | 0.84 | 0.82 |

|                                                                     |       |      |      |      |      |      |      |
|---------------------------------------------------------------------|-------|------|------|------|------|------|------|
| KNORA-E                                                             | 83.33 | 0.85 | 0.83 | 0.83 | 0.74 | 0.75 | 0.76 |
| META-DES                                                            | 88.88 | 0.88 | 0.88 | 0.88 | 0.84 | 0.82 | 0.84 |
| <b>Manual Augmentation + Augmentation with Borderline-SMOTE SVM</b> |       |      |      |      |      |      |      |
| Decision Tree                                                       | 94.44 | 0.95 | 0.94 | 0.93 | 0.90 | 0.91 | 0.91 |
| Random Forest                                                       | 77.77 | 0.79 | 0.77 | 0.78 | 0.70 | 0.66 | 0.65 |
| Adaboost DT                                                         | 61.11 | 0.75 | 0.61 | 0.64 | 0.58 | 0.46 | 0.44 |
| OLA                                                                 | 88.88 | 0.91 | 0.88 | 0.89 | 0.77 | 0.83 | 0.89 |
| LCA                                                                 | 94.44 | 0.97 | 0.94 | 0.95 | 0.90 | 0.92 | 0.91 |
| KNORA-U                                                             | 83.33 | 0.80 | 0.83 | 0.81 | 0.63 | 0.74 | 0.84 |
| KNORA-E                                                             | 94.44 | 0.96 | 0.94 | 0.94 | 0.93 | 0.91 | 0.90 |
| META-DES                                                            | 94.44 | 0.96 | 0.94 | 0.94 | 0.93 | 0.91 | 0.90 |

Table S3. Results for the multiple stratified CV method without using the framework proposed by Pineda-Bautista et al.

|                            | ACC   | PR   | Recall | Weighted F1 | Macro F1 | MCC  | FMI  |
|----------------------------|-------|------|--------|-------------|----------|------|------|
| <b>Manual Augmentation</b> |       |      |        |             |          |      |      |
| Decision Tree              | 92.33 | 0.92 | 0.92   | 0.91        | 0.88     | 0.90 | 0.86 |
| Random Forest              | 96.66 | 0.94 | 0.96   | 0.95        | 0.92     | 0.95 | 0.96 |
| Adaboost DT                | 97.33 | 0.96 | 0.97   | 0.96        | 0.94     | 0.96 | 0.96 |
| OLA                        | 90.66 | 0.88 | 0.90   | 0.88        | 0.82     | 0.87 | 0.88 |
| LCA                        | 87.33 | 0.83 | 0.87   | 0.84        | 0.78     | 0.81 | 0.82 |
| KNORA-U                    | 91.00 | 0.88 | 0.91   | 0.88        | 0.82     | 0.87 | 0.89 |

|         |       |      |      |      |      |      |      |
|---------|-------|------|------|------|------|------|------|
| KNORA-E | 91.33 | 0.88 | 0.91 | 0.89 | 0.82 | 0.87 | 0.90 |
|---------|-------|------|------|------|------|------|------|

|          |       |      |      |      |      |      |      |
|----------|-------|------|------|------|------|------|------|
| META-DES | 91.66 | 0.89 | 0.91 | 0.89 | 0.84 | 0.88 | 0.88 |
|----------|-------|------|------|------|------|------|------|

**Manual Augmentation + Augmentation with SMOTE**

|                      |              |             |             |             |             |             |             |
|----------------------|--------------|-------------|-------------|-------------|-------------|-------------|-------------|
| <b>Decision Tree</b> | <b>98.99</b> | <b>0.99</b> | <b>0.99</b> | <b>0.98</b> | <b>0.98</b> | <b>0.98</b> | <b>0.98</b> |
|----------------------|--------------|-------------|-------------|-------------|-------------|-------------|-------------|

|               |       |      |      |      |      |      |      |
|---------------|-------|------|------|------|------|------|------|
| Random Forest | 95.00 | 0.92 | 0.95 | 0.93 | 0.89 | 0.92 | 0.91 |
|---------------|-------|------|------|------|------|------|------|

|                    |              |             |             |             |             |             |             |
|--------------------|--------------|-------------|-------------|-------------|-------------|-------------|-------------|
| <b>Adaboost DT</b> | <b>97.99</b> | <b>0.96</b> | <b>0.98</b> | <b>0.97</b> | <b>0.95</b> | <b>0.97</b> | <b>0.97</b> |
|--------------------|--------------|-------------|-------------|-------------|-------------|-------------|-------------|

|     |       |      |      |      |      |      |      |
|-----|-------|------|------|------|------|------|------|
| OLA | 93.00 | 0.94 | 0.93 | 0.92 | 0.84 | 0.90 | 0.88 |
|-----|-------|------|------|------|------|------|------|

|     |       |      |      |      |      |      |      |
|-----|-------|------|------|------|------|------|------|
| LCA | 89.66 | 0.92 | 0.89 | 0.89 | 0.87 | 0.86 | 0.81 |
|-----|-------|------|------|------|------|------|------|

|         |       |      |      |      |      |      |      |
|---------|-------|------|------|------|------|------|------|
| KNORA-U | 92.00 | 0.94 | 0.92 | 0.91 | 0.89 | 0.89 | 0.87 |
|---------|-------|------|------|------|------|------|------|

|         |       |      |      |      |      |      |      |
|---------|-------|------|------|------|------|------|------|
| KNORA-E | 93.99 | 0.95 | 0.94 | 0.93 | 0.86 | 0.91 | 0.90 |
|---------|-------|------|------|------|------|------|------|

|          |       |      |      |      |      |      |      |
|----------|-------|------|------|------|------|------|------|
| META-DES | 93.33 | 0.93 | 0.93 | 0.92 | 0.87 | 0.90 | 0.89 |
|----------|-------|------|------|------|------|------|------|

**Manual Augmentation + Augmentation with Borderline-SMOTE**

|               |       |      |      |      |      |      |      |
|---------------|-------|------|------|------|------|------|------|
| Decision Tree | 98.00 | 0.98 | 0.98 | 0.97 | 0.96 | 0.97 | 0.98 |
|---------------|-------|------|------|------|------|------|------|

|               |       |      |      |      |      |      |      |
|---------------|-------|------|------|------|------|------|------|
| Random Forest | 94.00 | 0.91 | 0.94 | 0.92 | 0.87 | 0.91 | 0.92 |
|---------------|-------|------|------|------|------|------|------|

|             |       |      |      |      |      |      |      |
|-------------|-------|------|------|------|------|------|------|
| Adaboost DT | 98.33 | 0.97 | 0.98 | 0.97 | 0.96 | 0.97 | 0.98 |
|-------------|-------|------|------|------|------|------|------|

|     |       |      |      |      |      |      |      |
|-----|-------|------|------|------|------|------|------|
| OLA | 92.00 | 0.92 | 0.92 | 0.91 | 0.87 | 0.89 | 0.85 |
|-----|-------|------|------|------|------|------|------|

|     |       |      |      |      |      |      |      |
|-----|-------|------|------|------|------|------|------|
| LCA | 91.00 | 0.92 | 0.91 | 0.90 | 0.85 | 0.87 | 0.84 |
|-----|-------|------|------|------|------|------|------|

|         |       |      |      |      |      |      |      |
|---------|-------|------|------|------|------|------|------|
| KNORA-U | 92.00 | 0.93 | 0.92 | 0.91 | 0.86 | 0.90 | 0.87 |
|---------|-------|------|------|------|------|------|------|

|         |       |      |      |      |      |      |      |
|---------|-------|------|------|------|------|------|------|
| KNORA-E | 93.00 | 0.92 | 0.93 | 0.91 | 0.85 | 0.90 | 0.90 |
|---------|-------|------|------|------|------|------|------|

|          |       |      |      |      |      |      |      |
|----------|-------|------|------|------|------|------|------|
| META-DES | 93.66 | 0.93 | 0.93 | 0.92 | 0.88 | 0.91 | 0.91 |
|----------|-------|------|------|------|------|------|------|

**Manual Augmentation + Augmentation with Borderline-SMOTE SVM**

|               |       |      |      |      |      |      |      |
|---------------|-------|------|------|------|------|------|------|
| Decision Tree | 95.00 | 0.93 | 0.95 | 0.93 | 0.91 | 0.93 | 0.91 |
| Random Forest | 95.00 | 0.93 | 0.95 | 0.93 | 0.89 | 0.92 | 0.93 |
| Adaboost DT   | 95.33 | 0.93 | 0.95 | 0.94 | 0.92 | 0.93 | 0.91 |
| OLA           | 92.33 | 0.91 | 0.92 | 0.90 | 0.85 | 0.89 | 0.89 |
| LCA           | 92.00 | 0.91 | 0.92 | 0.90 | 0.85 | 0.88 | 0.87 |
| KNORA-U       | 92.00 | 0.92 | 0.92 | 0.91 | 0.86 | 0.89 | 0.89 |
| KNORA-E       | 92.66 | 0.90 | 0.92 | 0.91 | 0.86 | 0.89 | 0.89 |
| META-DES      | 95.00 | 0.95 | 0.95 | 0.94 | 0.90 | 0.93 | 0.94 |

Table S4. Results for the nested CV method without using the framework proposed by Pineda-Bautista et al.

|                                                      | ACC   | PR   | Recall | Weighted F1 | Macro F1 | MCC  | FMI  |
|------------------------------------------------------|-------|------|--------|-------------|----------|------|------|
| <b>Manual Augmentation</b>                           |       |      |        |             |          |      |      |
| Decision Tree                                        | 92.33 | 0.92 | 0.92   | 0.91        | 0.90     | 0.90 | 0.82 |
| Random Forest                                        | 94.33 | 0.90 | 0.94   | 0.92        | 0.87     | 0.91 | 0.92 |
| Adaboost DT                                          | 93.66 | 0.92 | 0.93   | 0.92        | 0.90     | 0.91 | 0.86 |
| OLA                                                  | 90.33 | 0.91 | 0.90   | 0.89        | 0.82     | 0.86 | 0.86 |
| LCA                                                  | 86.33 | 0.84 | 0.86   | 0.83        | 0.77     | 0.81 | 0.79 |
| KNORA-U                                              | 90.33 | 0.87 | 0.90   | 0.88        | 0.82     | 0.86 | 0.86 |
| KNORA-E                                              | 91.00 | 0.89 | 0.91   | 0.89        | 0.83     | 0.87 | 0.89 |
| META-DES                                             | 91.00 | 0.87 | 0.91   | 0.88        | 0.81     | 0.87 | 0.89 |
| <b>Manual Augmentation + Augmentation with SMOTE</b> |       |      |        |             |          |      |      |
| Decision Tree                                        | 98.99 | 1.00 | 0.99   | 0.99        | 0.98     | 0.98 | 0.99 |

|                                                                     |              |             |             |             |             |             |             |
|---------------------------------------------------------------------|--------------|-------------|-------------|-------------|-------------|-------------|-------------|
| Random Forest                                                       | 92.33        | 0.95        | 0.92        | 0.92        | 0.87        | 0.89        | 0.87        |
| <b>Adaboost DT</b>                                                  | <b>98.00</b> | <b>0.97</b> | <b>0.98</b> | <b>0.97</b> | <b>0.97</b> | <b>0.97</b> | <b>0.95</b> |
| OLA                                                                 | 93.33        | 0.92        | 0.93        | 0.92        | 0.88        | 0.91        | 0.89        |
| LCA                                                                 | 89.33        | 0.91        | 0.89        | 0.89        | 0.84        | 0.85        | 0.81        |
| KNORA-U                                                             | 92.33        | 0.95        | 0.92        | 0.92        | 0.87        | 0.89        | 0.87        |
| KNORA-E                                                             | 93.99        | 0.94        | 0.94        | 0.93        | 0.89        | 0.91        | 0.89        |
| META-DES                                                            | 92.00        | 0.94        | 0.92        | 0.91        | 0.86        | 0.89        | 0.87        |
| <b>Manual Augmentation + Augmentation with Borderline-SMOTE</b>     |              |             |             |             |             |             |             |
| Decision Tree                                                       | 95.00        | 0.95        | 0.95        | 0.95        | 0.94        | 0.93        | 0.88        |
| Random Forest                                                       | 93.33        | 0.90        | 0.93        | 0.91        | 0.87        | 0.90        | 0.88        |
| Adaboost DT                                                         | 95.33        | 0.95        | 0.95        | 0.94        | 0.93        | 0.93        | 0.89        |
| OLA                                                                 | 91.66        | 0.93        | 0.91        | 0.91        | 0.86        | 0.88        | 0.87        |
| LCA                                                                 | 90.00        | 0.92        | 0.90        | 0.89        | 0.85        | 0.86        | 0.83        |
| KNORA-U                                                             | 90.66        | 0.91        | 0.90        | 0.89        | 0.84        | 0.87        | 0.85        |
| KNORA-E                                                             | 91.33        | 0.89        | 0.91        | 0.89        | 0.83        | 0.87        | 0.88        |
| META-DES                                                            | 94.33        | 0.95        | 0.94        | 0.93        | 0.89        | 0.92        | 0.92        |
| <b>Manual Augmentation + Augmentation with Borderline-SMOTE SVM</b> |              |             |             |             |             |             |             |
| Decision Tree                                                       | 96.00        | 0.94        | 0.96        | 0.95        | 0.91        | 0.94        | 0.95        |
| Random Forest                                                       | 93.66        | 0.91        | 0.93        | 0.91        | 0.88        | 0.90        | 0.89        |
| Adaboost DT                                                         | 93.99        | 0.93        | 0.94        | 0.93        | 0.89        | 0.91        | 0.90        |
| OLA                                                                 | 90.33        | 0.89        | 0.90        | 0.88        | 0.82        | 0.86        | 0.87        |

|          |       |      |      |      |      |      |      |
|----------|-------|------|------|------|------|------|------|
| LCA      | 92.66 | 0.93 | 0.92 | 0.92 | 0.88 | 0.90 | 0.87 |
| KNORA-U  | 92.00 | 0.92 | 0.92 | 0.91 | 0.85 | 0.89 | 0.88 |
| KNORA-E  | 92.33 | 0.91 | 0.92 | 0.90 | 0.84 | 0.89 | 0.91 |
| META-DES | 93.00 | 0.92 | 0.93 | 0.91 | 0.86 | 0.90 | 0.91 |

---

Figure S1. PRC curves for the DT model using SMOTE and the nested CV method for the four first folds.

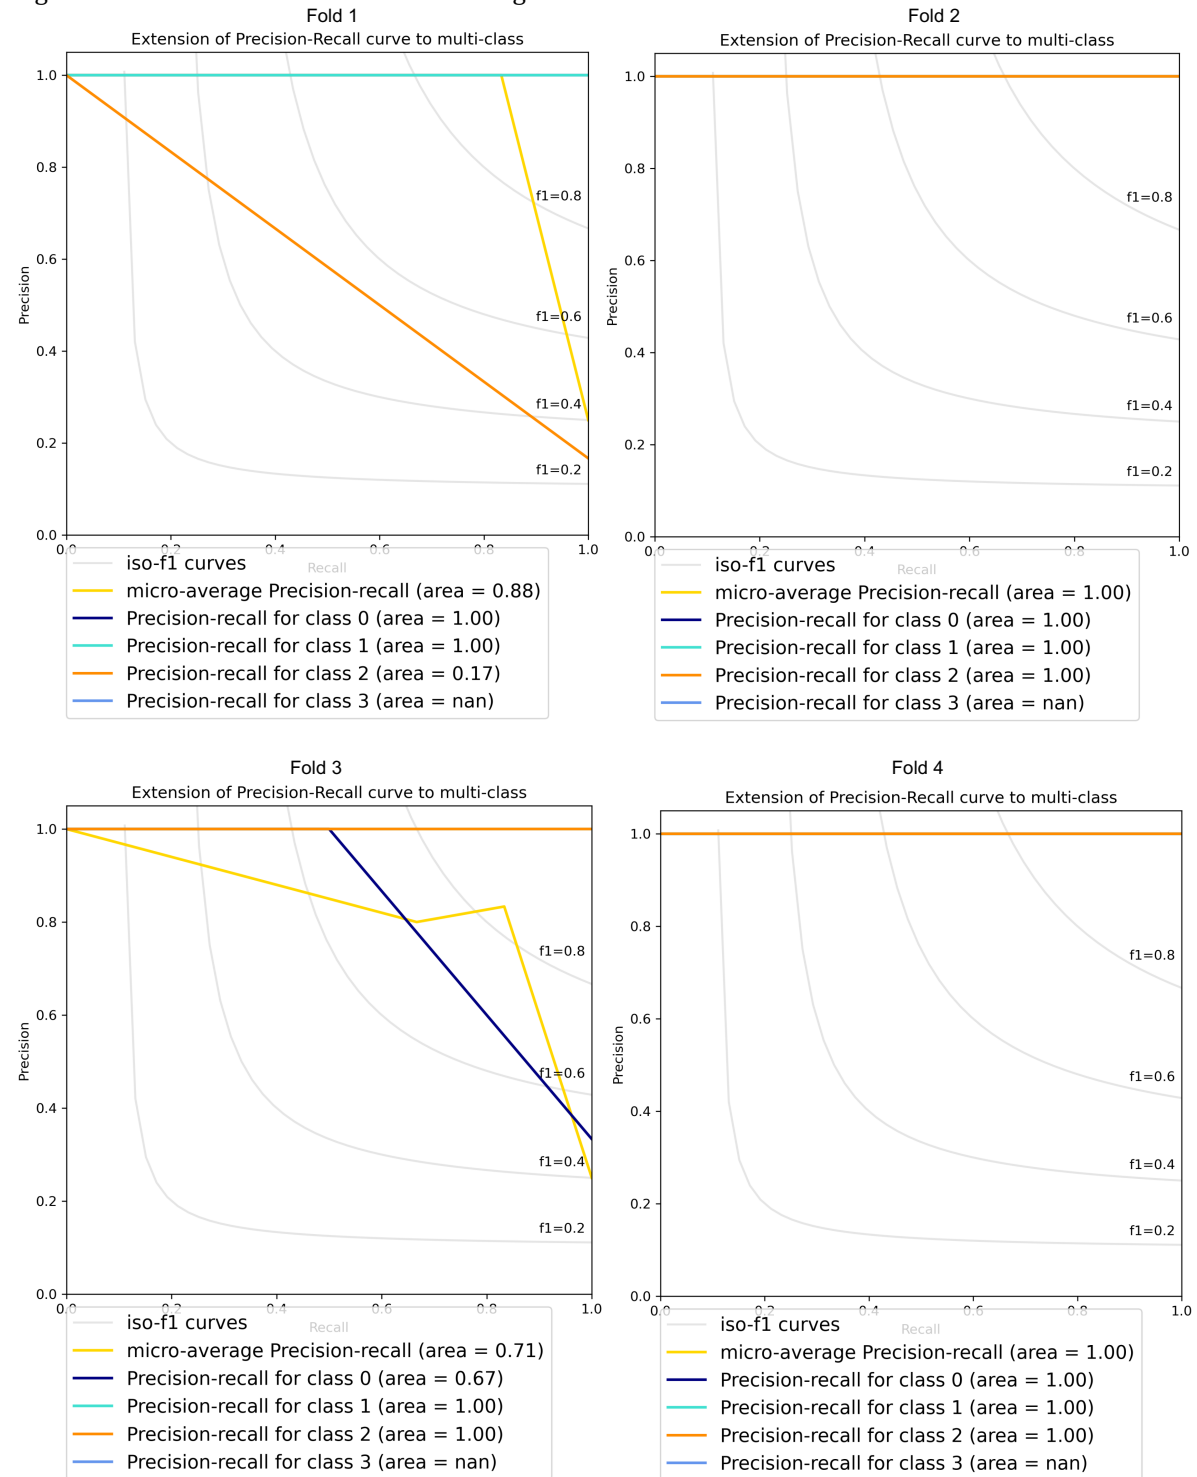



Figure S2. PRC curves for the DT model using SMOTE and the nested CV method for the fifth, sixth, seventh, and eighth folds.

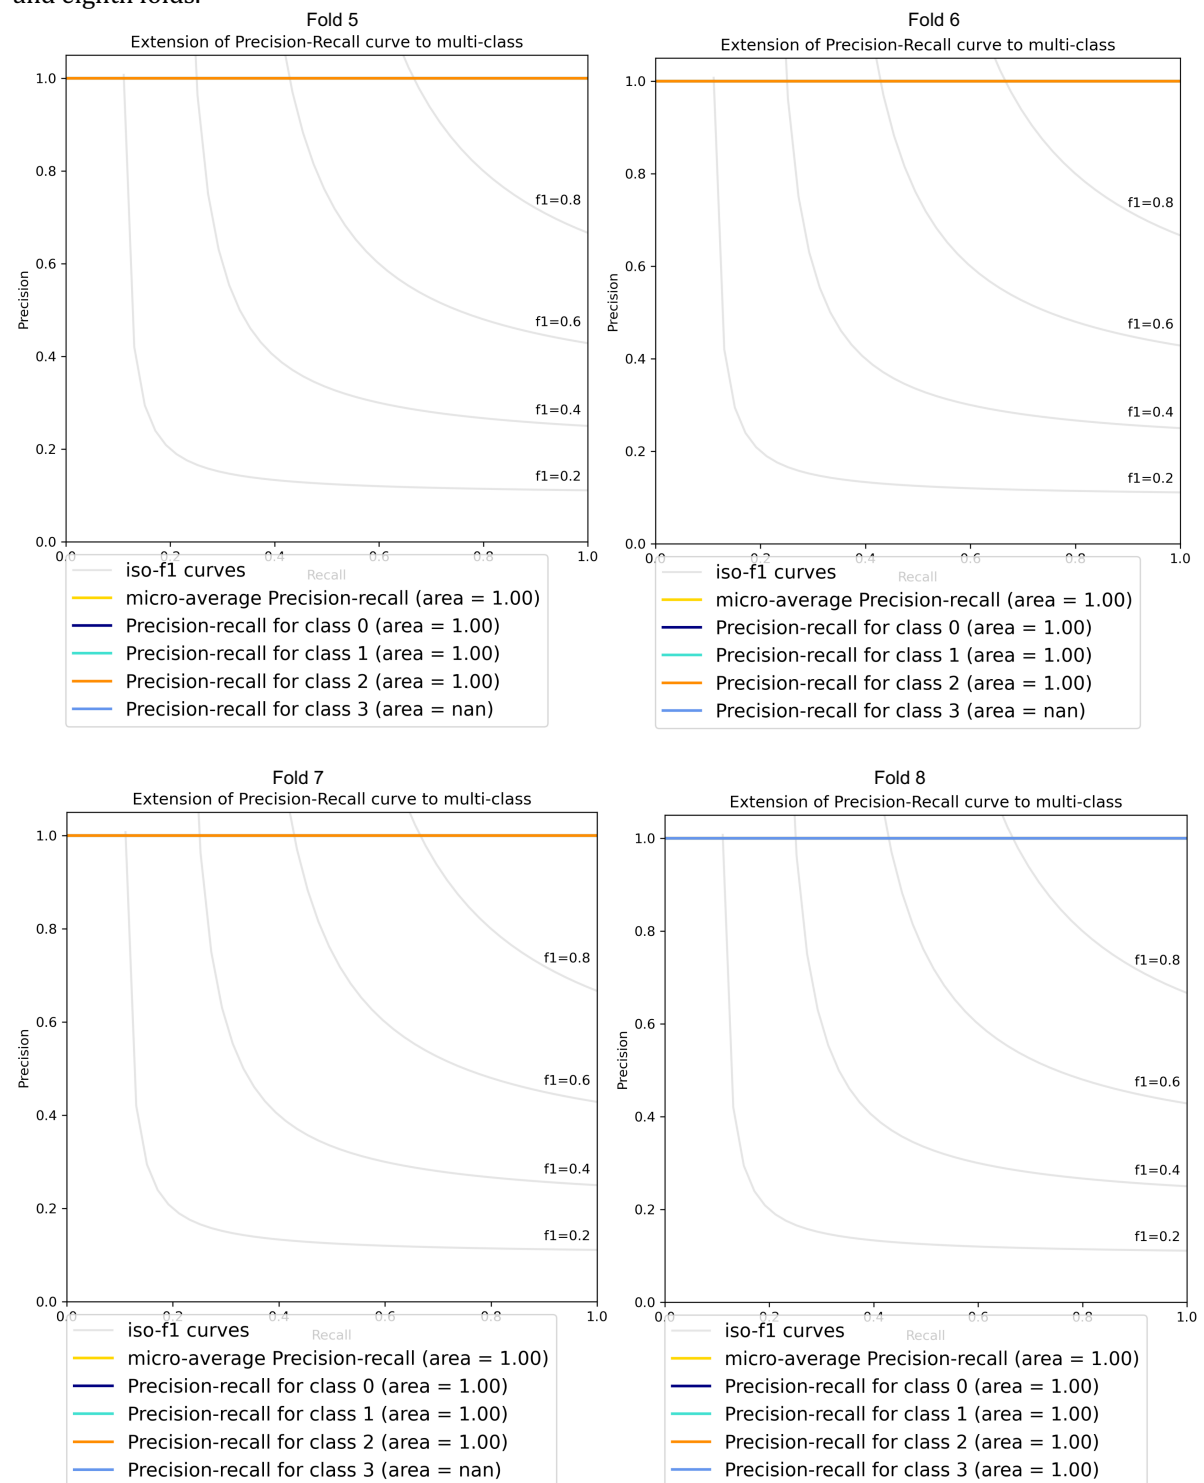

Figure S3. PRC curves for the DT model using SMOTE and the nested CV method for the ninth and tenth folds.

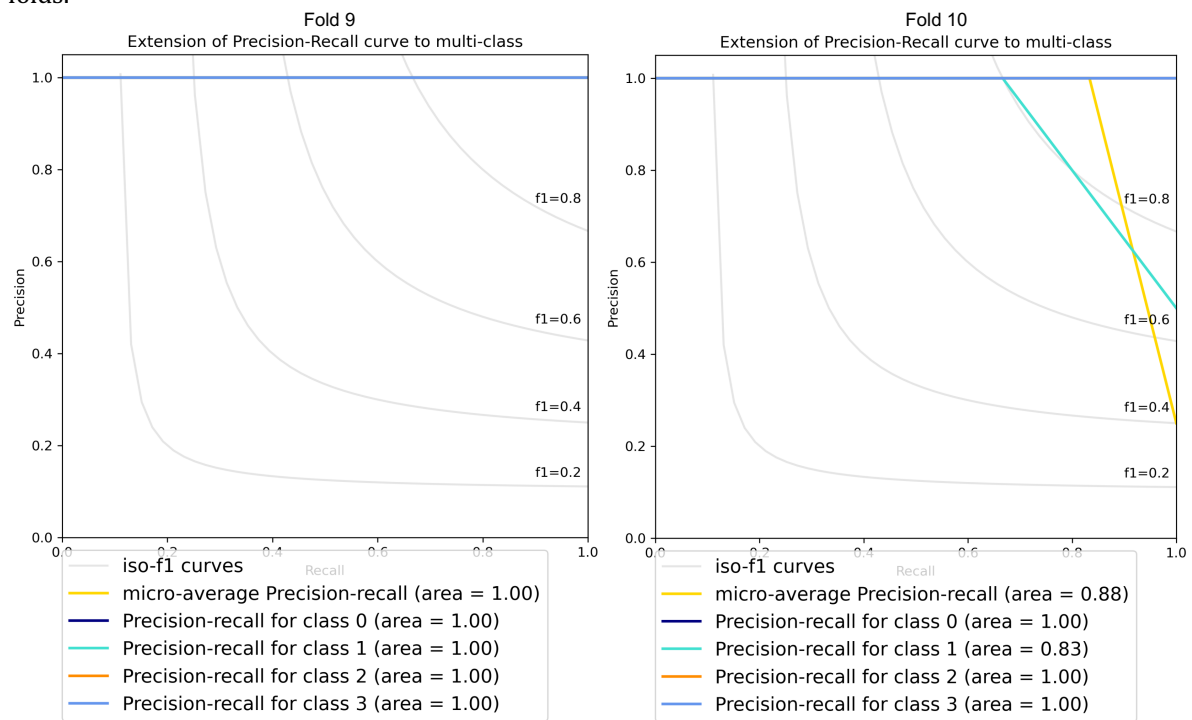

Supplement: s1 [file s1]
